# Supplementary material for: New Approaches to Critical Illness Polyneuromyopathy: High-Resolution Neuromuscular Ultrasound Characteristics and Cytokine Profiling
Source: Springer Nature journal article supplement (doi:10.1007/s12028-020-01148-2), 2020-11-24

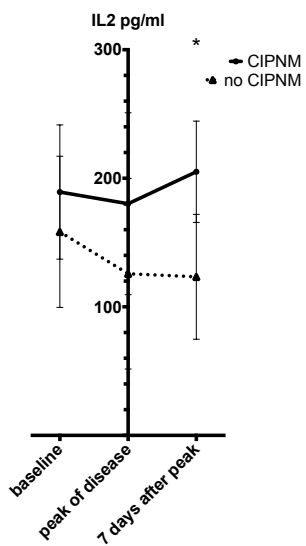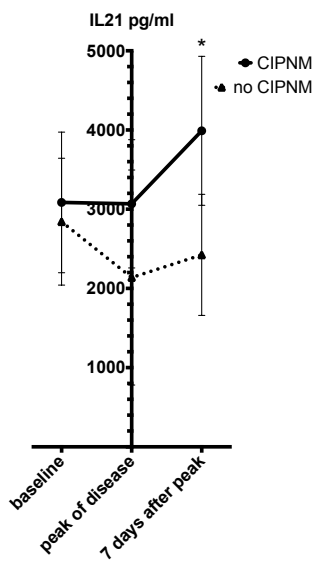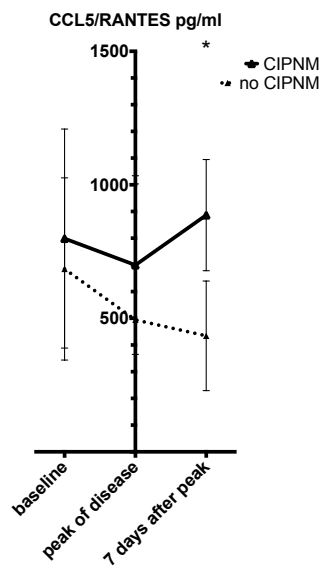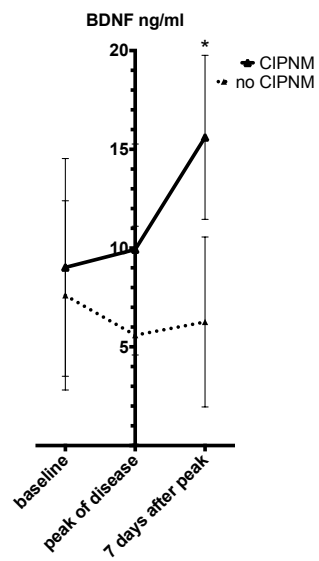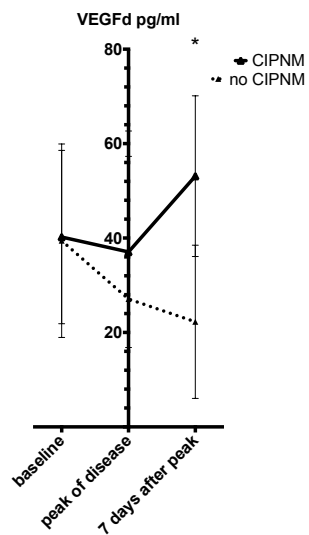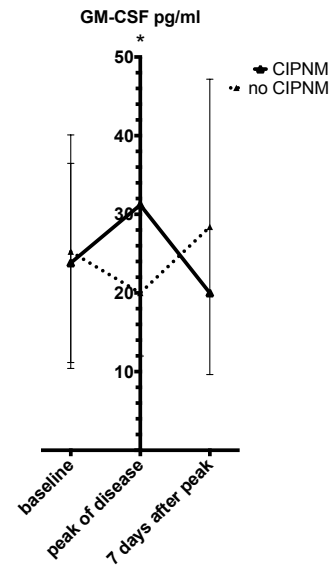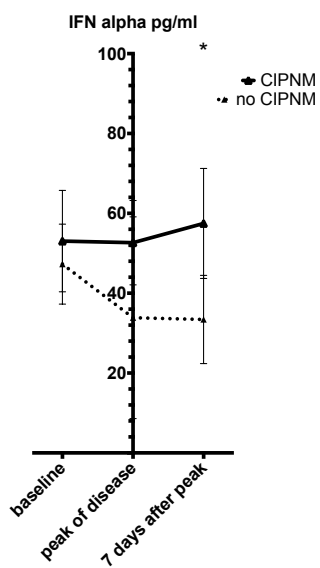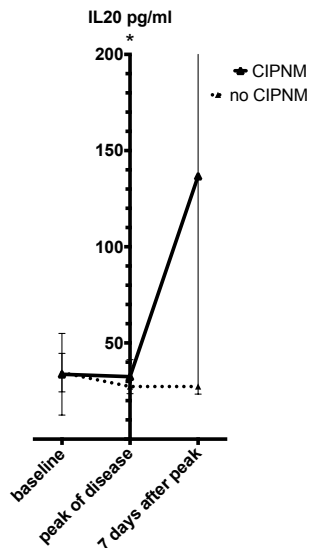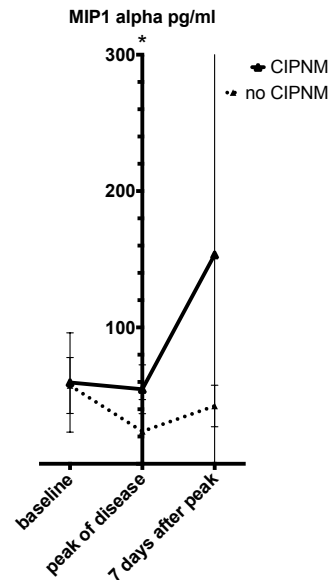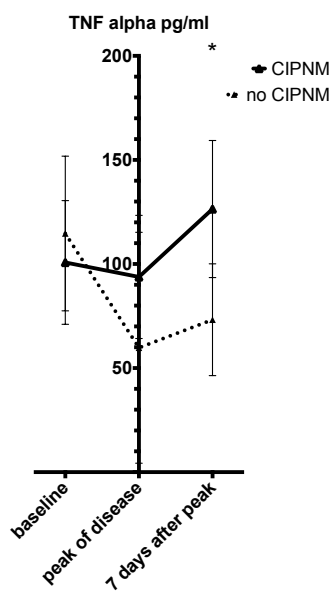

Supplement: MOESM2 [file 18620838]
